# Supplementary material
Source: PubMed Central journal article supplement (PMC5884107)

## SUPPLEMENTARY INFORMATION

**Supplementary Table 1. Sorted cells, clones identified and % DsRed in each population analysed.** This table compiles the information of numbers of barcodes and % of DsRed from each mouse analysed, including the sorting logics for each population in each experiment.

**Supplementary Table 2. Cluster differential expression analysis results.** This set of tables contains the raw results of cluster differential expression analysis for each cluster under different tabs.

**Supplementary Figure 1. Sorting scheme for granulocytes, monocytes, erythroblasts, megakaryoblasts and B-cell precursors. a,** Frequency of DsRed<sup>+</sup> cells in granulocytes, monocytes, erythroblasts, megakaryoblasts and B-progenitors in the bone marrow of M2/HSB/Tn mice pulsed with Dox for 48h and chased for 1 week. Shown are representative FACS plots from three independent experiments.

**Supplementary Figure 2. Sorting scheme for HSC and MPP subpopulations. a,** Frequency of DsRed<sup>+</sup> cells in LT-HSC, MPP1, MPP2, MPP3 and MPP4 in the bone marrow of M2/HSB/Tn mice pulsed with Dox for 48h and chased for 1 week. Shown are representative FACS plots from three independent experiments.

**Supplementary Figure 3. Additional sorting gating schemes.** This image contains remaining sorting schemes not shown in Extended Data figures.



# Supplementary fig. 1

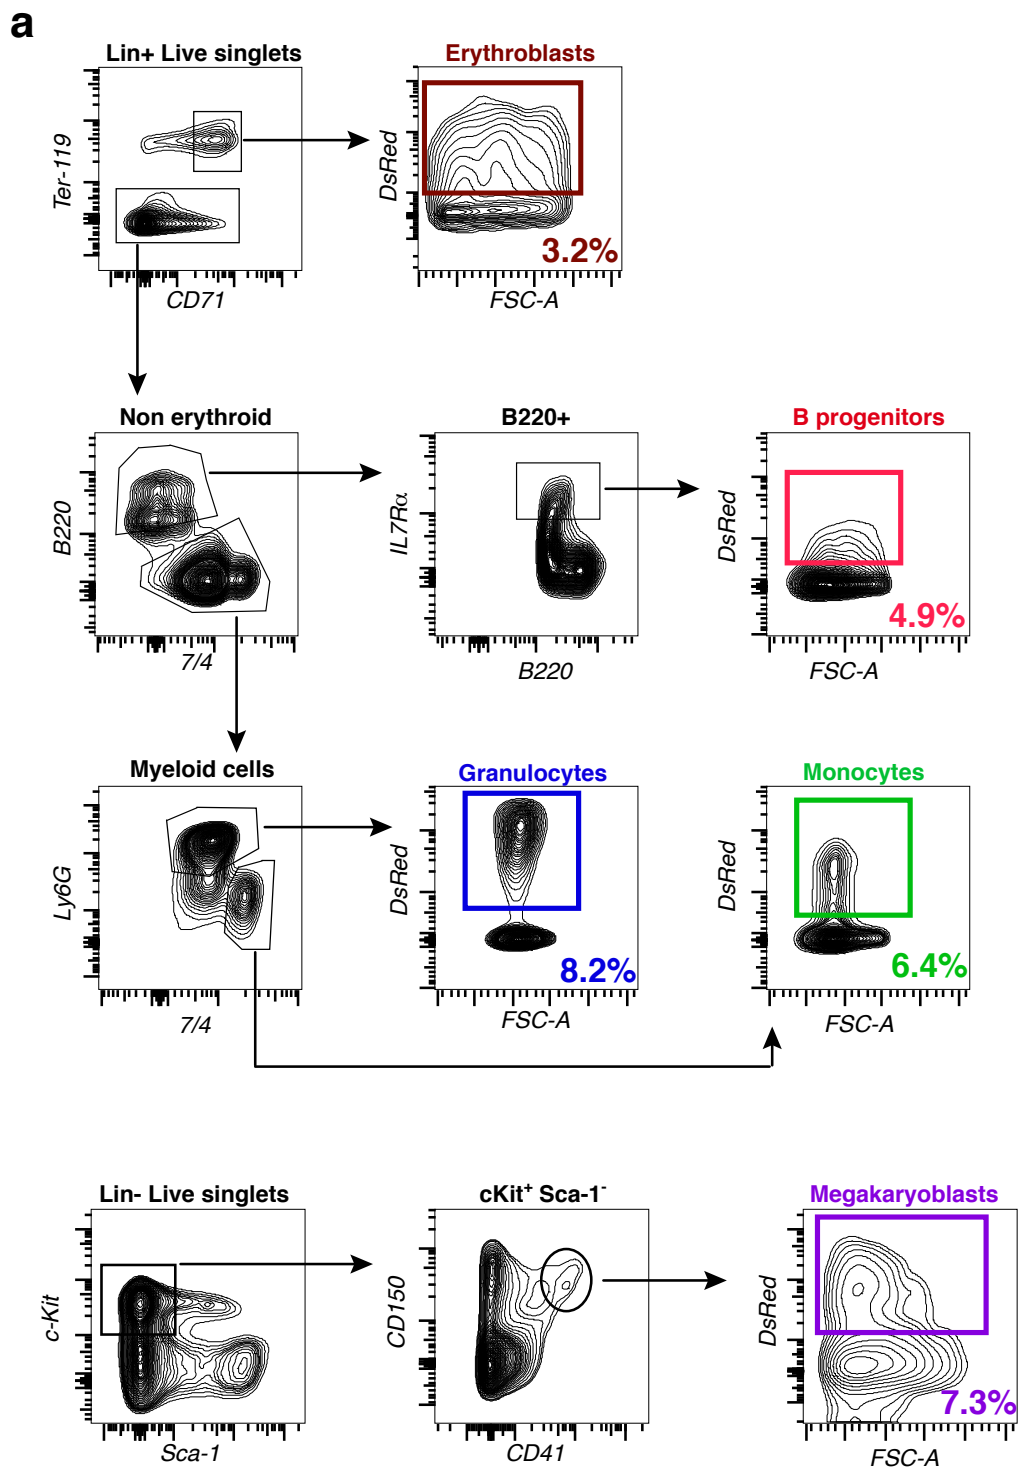

Supplementary fig. 2

a

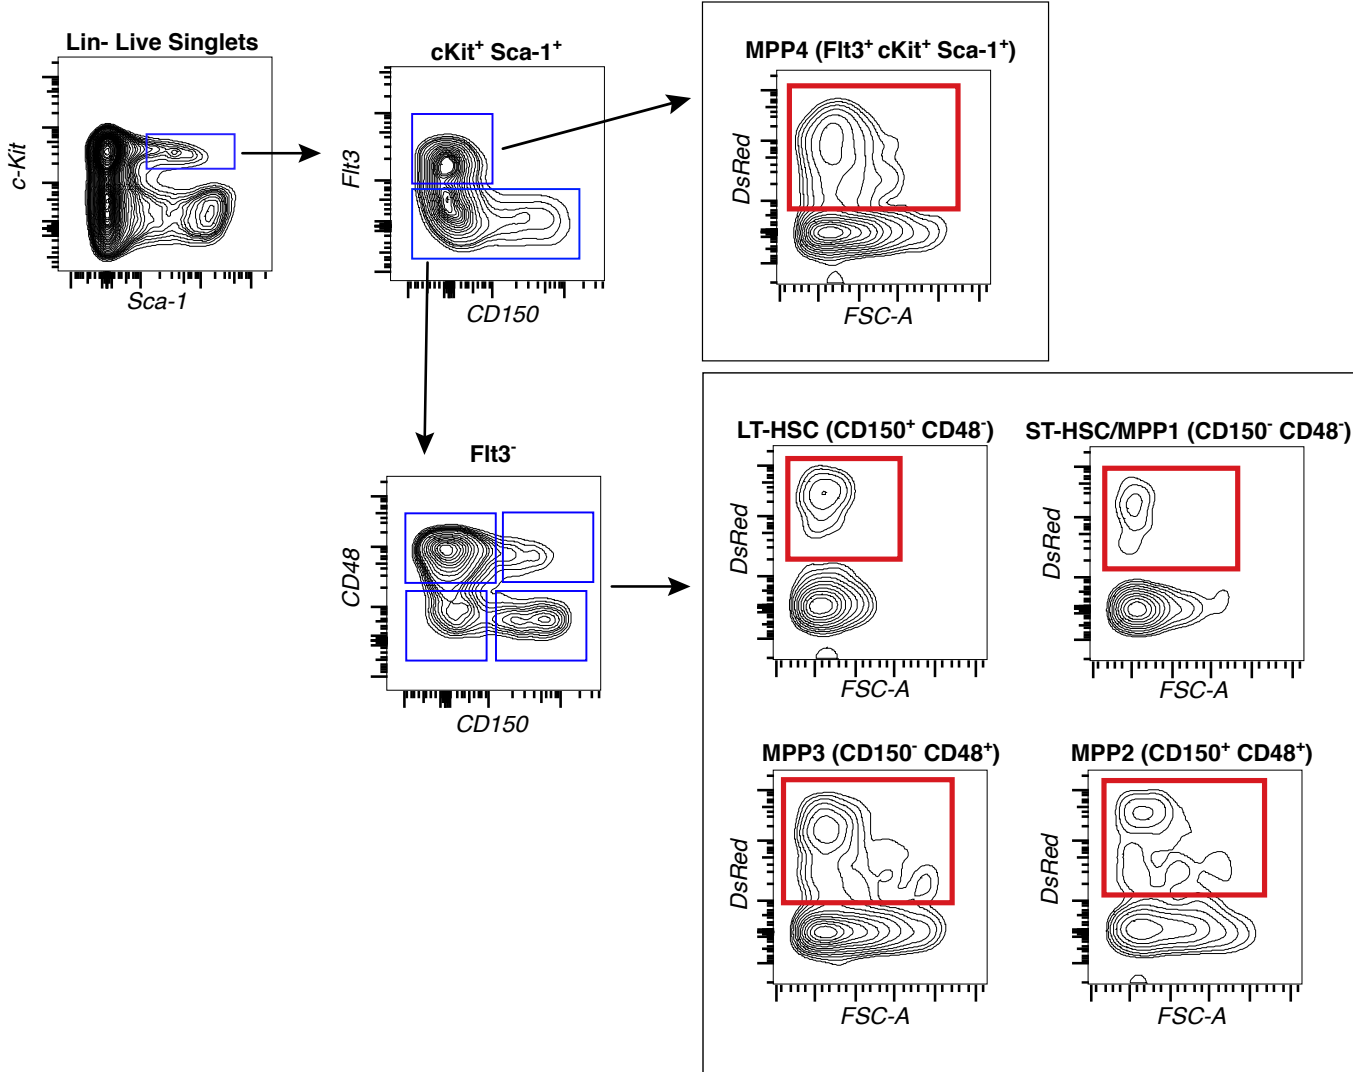

# Supplementary fig. 3

Strategy for sorting CD41+ and CD41- SLAM HSCs:

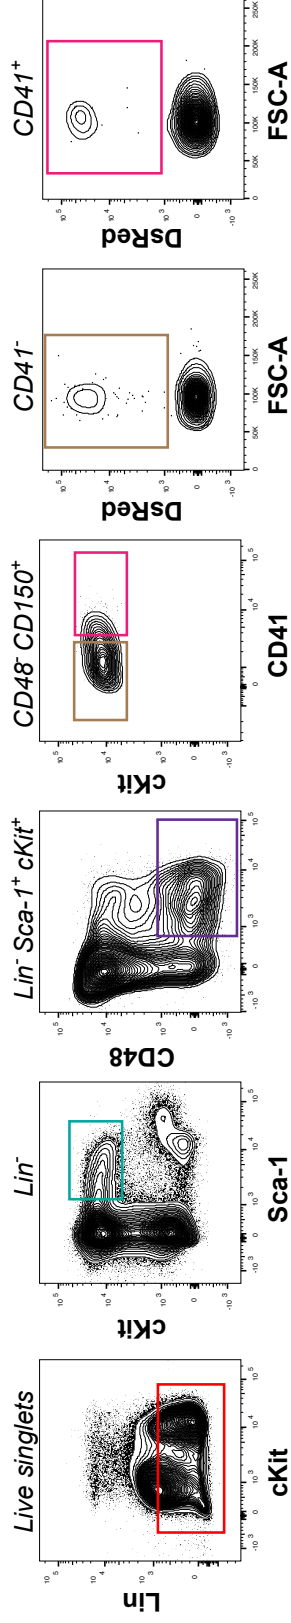

Strategy for sorting GMP/CMP/MEP/MKP:

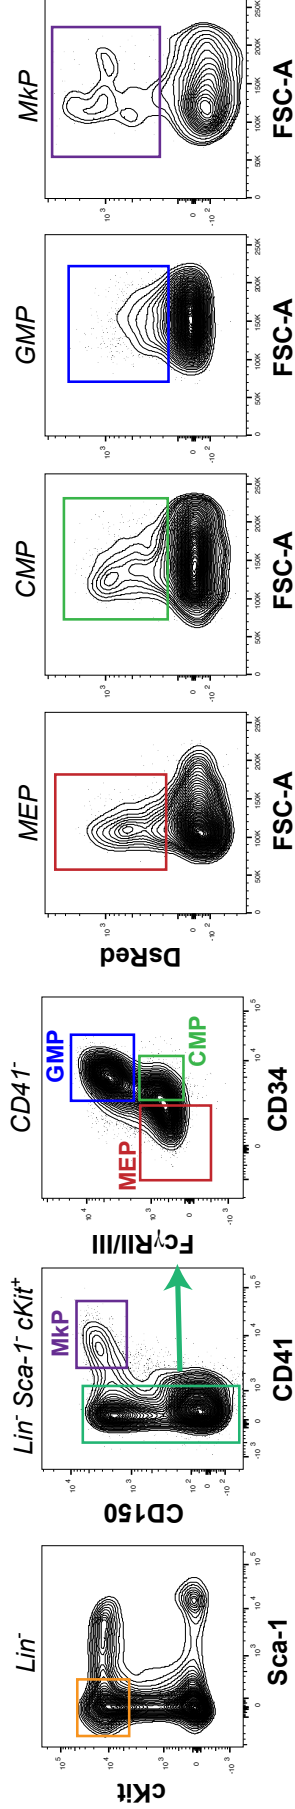

Strategy for sorting Myeloid vs. Lymphoid cultures:

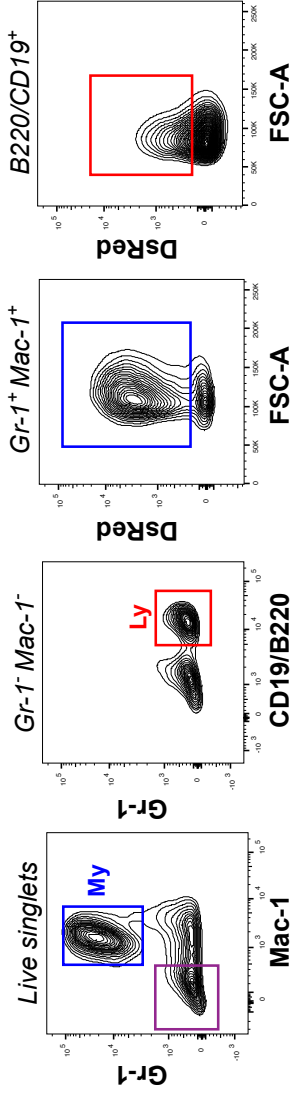

Strategy for sorting donor Lin+ in transplants:

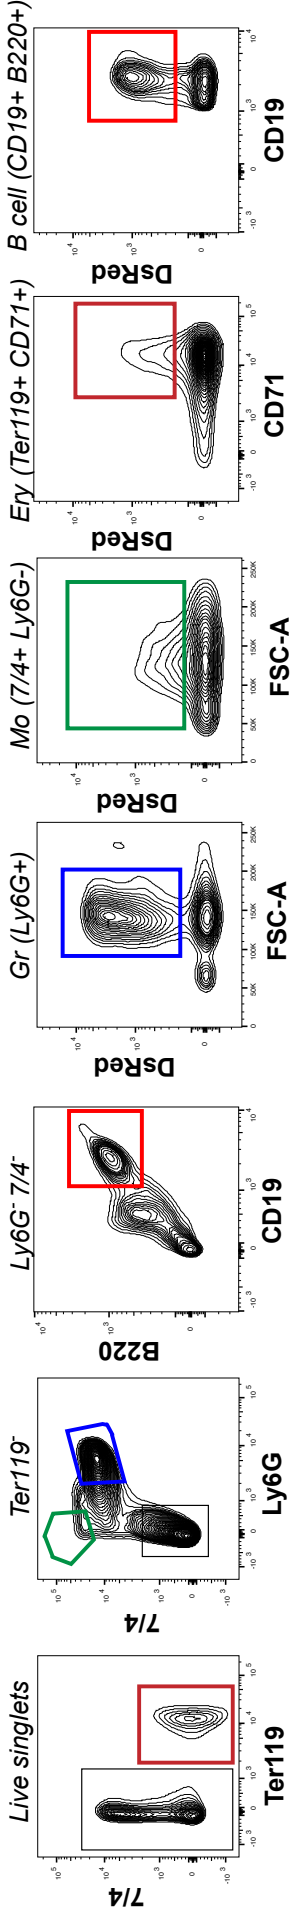

Supplement: NIHMS922306-supplement-2.pdf [file NIHMS922306-supplement-2.pdf]
